# Supplementary figures and images for: Towards modelling light processes of blue-light photoreceptors. Pyrene–isoalloxazine (flavin)–phenothiazine triad: electrochemical, photophysical, investigations and quantum chemical calculations
Source: Royal Society of Chemistry journal article supplement (doi:10.1039/b301279d), 2003-01-01

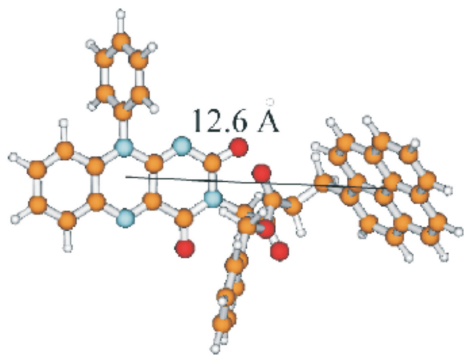

(A)

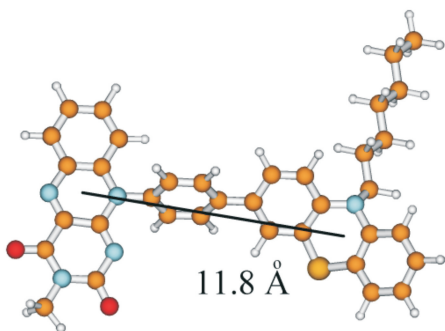

(B)

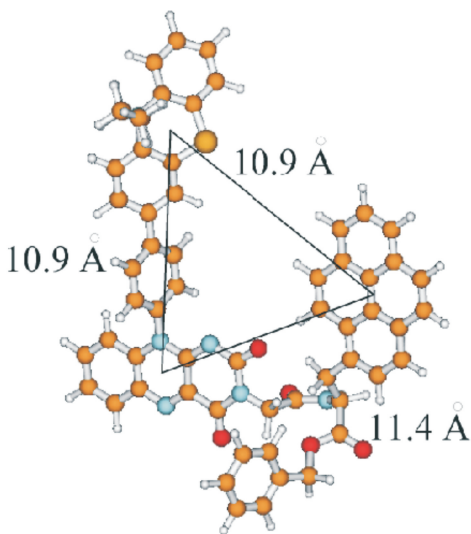

(C)

Supplement: b301279d-f17.pdf [file b301279d-f17.pdf]

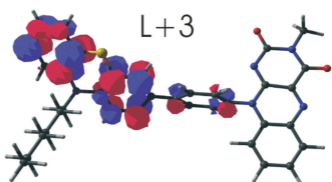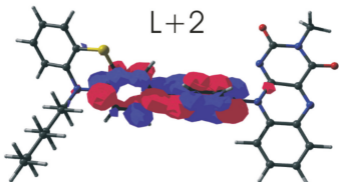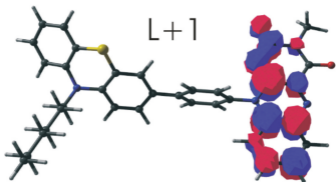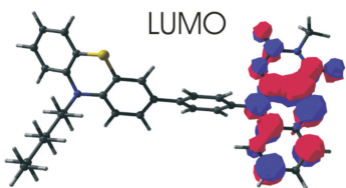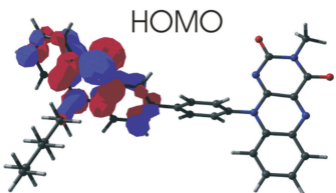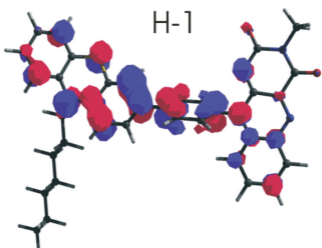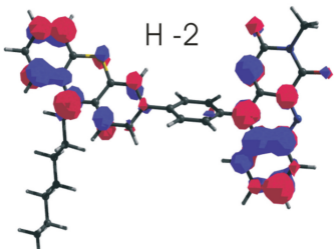

Supplement: b301279d-f18.pdf [file b301279d-f18.pdf]

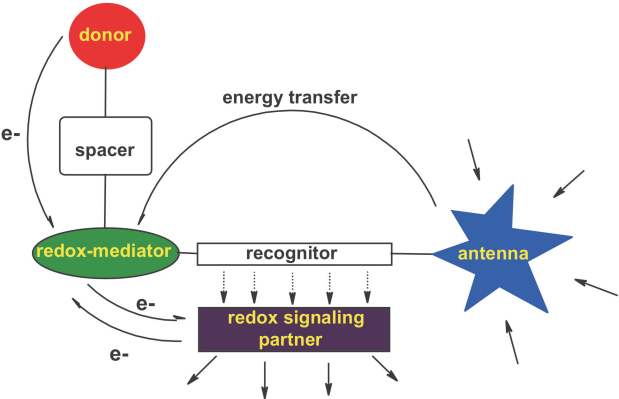

Scheme 1

Supplement: b301279d-s1.pdf [file b301279d-s1.pdf]
